# Supplementary material
Source: HighWire-hosted journal article supplement (https://bmjopen.bmj.com/content/14/11/e086464)
Supplement: inline-supplementary-material-1 [file inline-supplementary-material-1.pdf]

Appendix 1. Assessing compliance for all elements and sub-elements (part two)

| Element               | Sub-element                             | Example from PLS author instructions                                      | Method/criteria for assessing compliance                                                                                | Compliance scoring<br>Full = 2, Partial = 1, Non = 0                                                                                                                            |
|-----------------------|-----------------------------------------|---------------------------------------------------------------------------|-------------------------------------------------------------------------------------------------------------------------|---------------------------------------------------------------------------------------------------------------------------------------------------------------------------------|
| Word count/PLS length | Maximum number of words                 | No more than 250 words.                                                   | Copied the PLS text into a document in MS Word. Recorded the number of words and compared with PLS author instructions. | Full - within 5% +/- maximum word limit.<br>Partial - 5-10% +/- maximum word limit.<br>Non - > 10% +/- maximum word limit.                                                      |
|                       | PLS length                              | Two or three short sentences.                                             | Viewed the PLS and noted whether it was written in paragraph style or similar.                                          | Full - 100% correct number of sentences of stated length.<br>Partial - ≥ 75% correct number of sentences of stated length.<br>Non - < 75% number of sentences of stated length. |
| Content               | Based on manuscript/reflects manuscript | They must reflect the actual information reported in the published study. | Read the PLS and entire journal article then compared both texts.                                                       | Full - PLS was clearly based on the manuscript.<br>Partial - Unclear if PLS was based on the manuscript.<br>Non - PLS was not based on the manuscript.                          |
|                       | Background                              | Why was the study done?                                                   | Read the PLS and entire journal article then compared both texts.                                                       | Full - Background included in the PLS.<br>Partial - Unclear if background included in the PLS.<br>Non - Background not included in the PLS.                                     |

|           |                                 |                                                     |                                                                   |                                                                                                                                                                                                                                          |
|-----------|---------------------------------|-----------------------------------------------------|-------------------------------------------------------------------|------------------------------------------------------------------------------------------------------------------------------------------------------------------------------------------------------------------------------------------|
|           | Methods                         | What did the researchers do and find?               | Read the PLS and entire journal article then compared both texts. | Full - Methods included in the PLS.<br>Partial - Unclear if methods included in the PLS.<br>Non - Methods not included in the PLS.                                                                                                       |
|           | Main findings/take-home message | What do the results mean?                           | Read the PLS and entire journal article then compared both texts. | Full - Main findings/take-home message included in the PLS<br>Partial - Unclear if main findings/take-home message included in the PLS.<br>Non - Main findings/take-home message not included in the PLS.                                |
|           | Impact/"so what" of research    | What is the objective influence on the wider field? | Read the PLS and article Discussion then compared both texts.     | Full - Impact/"so what" of research included in the PLS.<br>Partial - Unclear if impact/"so what" of research included in the PLS.<br>Non - Impact/"so what" of research not included in the PLS.                                        |
|           | Other                           | Both merits and limitations should be discussed.    | Read the PLS and article Discussion then compared both texts.     | Full - Merits and limitations (or relevant text) were present in PLS.<br>Partial - Unclear if merits and limitations (or relevant text) were present in PLS.<br>Non - Merits and limitations (or relevant text) were not present in PLS. |
| Structure | Bullet points                   | Use bullet points.                                  | Viewed the PLS and noted whether it contained bullet points.      | Full - used bullet points.<br>Partial - used some bullet points.<br>Non - used no bullet points.                                                                                                                                         |

|                  |                                  |                                                                                           |                                                                                                                                                                                                                                                                                                                                                                                                                                                                                                                                                                                     |                                                                                                                                                                                 |
|------------------|----------------------------------|-------------------------------------------------------------------------------------------|-------------------------------------------------------------------------------------------------------------------------------------------------------------------------------------------------------------------------------------------------------------------------------------------------------------------------------------------------------------------------------------------------------------------------------------------------------------------------------------------------------------------------------------------------------------------------------------|---------------------------------------------------------------------------------------------------------------------------------------------------------------------------------|
|                  | Paragraph style or similar       | Use short, clear sentences, short paragraphs.                                             | Viewed the PLS and noted whether it was written in paragraph style or similar.                                                                                                                                                                                                                                                                                                                                                                                                                                                                                                      | Full - 100% correct number of sentences of stated length.<br>Partial - ≥ 75% correct number of sentences of stated length.<br>Non - < 75% number of sentences of stated length. |
| Wording/language | Plain English/easy to understand | Should be written in an easy-to-understand manner.                                        | Based on score for the use of jargon                                                                                                                                                                                                                                                                                                                                                                                                                                                                                                                                                | Full - maximum of 2% rare words.<br>Partial - 3-5% rare words.<br>Non - >5 % rare words.                                                                                        |
|                  | Active voice                     | Sentences should be written in the active voice, rather than the passive voice.           | Analysed the PLS using an online real-time editor <sup>6</sup> and noted the number of times passive voice was used.                                                                                                                                                                                                                                                                                                                                                                                                                                                                | Full - No sentences in passive voice.<br>Partial - 1-3 sentences in passive voice.<br>Non - > 3 sentences in passive voice.                                                     |
|                  | Person-centred language          | Use person-centred language rather than focussing on the condition/illness or disability. | We established a priori criteria using principles of person-centred language that is based on guidance from resources produced by several peak bodies <sup>13</sup> .<br>- Using “person with X” or “person being treated for X” rather than “X disease” i.e., describing the condition(s) that a person has, not what a person is<br>- Avoiding words such as “sufferer”, “victim” or “afflicted”<br>- When referring to caregivers, using terms such as “caring for/supporting a person with X” or “living with the impact of X” rather than “burden of caring” or “carer burden” | Full - All wording person-centred.<br>Partial - 1 instance of non-person-centred language.<br>Non - >1 instance of non-person-centred language.                                 |
|                  | Use first person                 | Write in the first person.                                                                | Read the PLS and noted whether it was written in the first person.                                                                                                                                                                                                                                                                                                                                                                                                                                                                                                                  | Full - All sentences in the first person<br>Partial - 1-2 sentences in the first person.<br>Non - >2 sentences in the first person.                                             |

|                                  |                                  |                                                                                                       |                                                                                              |                                                                                                                                                                                      |
|----------------------------------|----------------------------------|-------------------------------------------------------------------------------------------------------|----------------------------------------------------------------------------------------------|--------------------------------------------------------------------------------------------------------------------------------------------------------------------------------------|
|                                  | Reading level/readability        | Suitable for someone in high school.                                                                  | Analysed the PLS using an online real-time editor* <sup>6</sup> and noted the reading level. | Full - Grade 8 reading level.<br>Partial - Grade 9 or 10 reading level.<br>Non - over grade 10 reading level.                                                                        |
|                                  | Other                            | Use absolute numbers instead of statistics and percentages.                                           | Read the PLS and noted whether it conformed to the PLS author instructions.                  | Full - Entire PLS conformed to the instruction.<br>Partial - if instruction states to avoid X e.g., statistics, 1 use of statistics.<br>Non - > 1 use of statistics.                 |
| Jargon, Acronyms & Abbreviations | Jargon - explain or avoid        | Avoid jargon. If you need to use a technical term, please explain it the first time you use it.       | Analysed the PLS using the De-Jargoniser ** tool. Noted the percentage of rare words.        | Full - maximum of 2% rare words.<br>Partial - 3-5% rare words.<br>Non - >5 % rare words.                                                                                             |
|                                  | Abbreviations - explain or avoid | Avoid abbreviations. If you need to use an abbreviation, please explain it the first time you use it. | Read the PLS and noted whether it contained any abbreviation.                                | Full - no abbreviations.<br>Partial - maximum of 2 unique abbreviations not explained before first time used.<br>Non - >2 unique abbreviations not explained before first time used. |

\* <https://shell.techlab.works/> <sup>8</sup>

\*\* <https://scienceandpublic.com/> <sup>14</sup>
